# Supplementary material
Source: MDPI journal article supplement (https://www.mdpi.com/1999-4893/2/1/108)
Supplement: s1 [file s1]

## MCAD INSTALLATION

(If, after reading this document, you need any assistance, please contact the authors by e-mail: [leonor.contreras@usach.cl](mailto:leonor.contreras@usach.cl) and [eliseo.benitez@gmail.com](mailto:eliseo.benitez@gmail.com))

### Requirements

- Java JRE 1.6 or higher (Windows should have a version included. If this is not the case, please proceed to install it)
- Java 3D 1.5. (Can be downloaded from [http://download.java.net/media/java3d/builds/release/1.5.1/java3d-1\\_5\\_1-windows-i586.exe](http://download.java.net/media/java3d/builds/release/1.5.1/java3d-1_5_1-windows-i586.exe))

### Installation

1. Extract the content from “mcad.zip” to C:\MCAD\MCAD1\MCAD1\bin
2. Create a batch (.bat) file named “MCAD.bat” for running the application, and place a shortcut on your Desktop:

The batch can be created by: right click and select “New” → “Batch file”. Following code then needs to be places into the “MCAD.bat” file:

```
set path=C:\Program Files\java\jre1.6.0_07\bin
set classpath=C:\MCAD\MCAD1\MCAD1\bin
java MCAD
```

You may have to add following line into the system properties:

```
set path= (the current path of your java JRE)
```

E.g., if your Windows version is in English, this should be in C:\Program Files\java\...\bin  
Find the correct path: you may run a search for a file named “j3dcore-d3d.dll”. Use the folder location of this file as the path.

Additionally, following path of the MCAD application also needs to be specified:

```
set classpath=C:\MCAD\MCAD1\MCAD1\bin
```

### Tips for running MCAD

1. Once the installation is finished, you can start the application by double clicking the “MCAD.bat”. This will start the MCAD welcome screen. Please click on “Accept”.
2. By clicking on the third icon at the upper side of the GUI interface, you can generate a NT. As an example you can use a1= 6; a2=6, and length=15. Also, you can choose zipper and enter the width and lenght, for instance 6 and 25, respectively.
3. NT is immediately generated in a large size. Drag the right button (ascendent direction) to see some atoms. Click on the left button and, with lower arrow (↓), choose the visualization size you prefer.
4. The icon “?” at the upper side of the GUI provides some help.
5. You can get information about atoms by clicking on the icon “i”. If you change the symbol “C” of a particular atom for “N” or “B”, change will occur and instructions are repeated as in point 3 before.
